# Supplementary material
Source: publisher figshare collection journal article supplement (https://springernature.figshare.com/ndownloader/files/13011521)
Supplement: Supplementary file 1 [file 13011521]

Appendix Figure 3. Labor market status, as reported in 1998 versus 2006 retrospective data for 1998, by sex, individuals ages 20-44 in 1998 and present in both waves (percentage)

| Status in 1998 from 2006 retrospective data | |
| --- | --- |
|  |  |

Source: Authors’ calculations based on ELMPS 1998 and ELMPS 2006
